# Supplementary material for: The phospholipid membrane compositions of bacterial cells, cancer cell lines and biological samples from cancer patients
Source: PubMed Central journal article supplement (PMC8529332; doi:10.1039/d1sc03597e), 2021-09-28
Supplement: SC-012-D1SC03597E-s001.pdf [file SC-012-D1SC03597E-s001.pdf]

## Comparative phospholipid membrane compositions of bacterial and cancer cell lines

Kira L. F. Hilton,<sup>†a</sup> Chandni Manwani,<sup>‡a/b</sup> Jessica E. Boles,<sup>a</sup> Lisa J. White,<sup>a</sup> Sena Ozturk,<sup>a</sup> Michelle D. Garrett<sup>\*b</sup> and Jennifer R. Hiscock<sup>\*a</sup>

### Contents

|                     |    |
|---------------------|----|
| Tables of data..... | 2  |
| Abbreviations.....  | 14 |
| References .....    | 16 |

**Tables of data**

Table S1 – Phospholipid membrane composition of bacterial cell lines. Inner refers to the inner leaflet of the cell membrane, whereat outer refers to the outer leaflet of the cell membrane. Herein, CM = cytoplasmic membrane and OM = outer membrane.

|                                                                        | Phospholipid    | Phase of growth (%) |     | Analysis Method | Growth Media              | Specific Notes               |                                                                                                                                                                                                                                                  |
|------------------------------------------------------------------------|-----------------|---------------------|-----|-----------------|---------------------------|------------------------------|--------------------------------------------------------------------------------------------------------------------------------------------------------------------------------------------------------------------------------------------------|
|                                                                        |                 | Unknown             | Log |                 |                           |                              | Stationary                                                                                                                                                                                                                                       |
| <b><i>Enterococcus faecium</i> (Gram +ve)</b>                          |                 |                     |     |                 |                           |                              |                                                                                                                                                                                                                                                  |
| S447 <sup>1</sup><br>(Daptomycin sensitive)                            | L-PG inner      |                     |     | 8.12            | 2D TLC, LC/ESI-MS/MS      | BHI broth                    | Sat - 14:0 (8 %), 16:0 (26 %), 18:0 (5 %)<br>Unsat - 16:1,7c (13 %), 18:1,6,9c (6 %), 18:1,9c (4 %), 18:1,7c (34 %)<br>Cyclic - 19:0 (3 %)                                                                                                       |
|                                                                        | L-PG outer      |                     |     | 6               |                           |                              |                                                                                                                                                                                                                                                  |
|                                                                        | PG whole cell   |                     |     | 34              |                           |                              |                                                                                                                                                                                                                                                  |
|                                                                        | CL whole cell   |                     |     | 29              |                           |                              |                                                                                                                                                                                                                                                  |
|                                                                        | DAG whole cell  |                     |     | 13              |                           |                              |                                                                                                                                                                                                                                                  |
| R446 <sup>1</sup><br>(Daptomycin resistant)                            | L-PG inner      |                     |     | 7               | 2D TLC, LC/ESI-MS/MS      | BHI broth                    | Sat - 14:0 (9 %), 16:0 (26 %), 18:0 (5 %)<br>Unsat - 16:1,7c (14 %), 18:1,6,9c (6 %), 18:1,9c (3 %), 18:1,7c (29 %)<br>Cyclic - 19:0 (7 %)                                                                                                       |
|                                                                        | L-PG outer      |                     |     | 9               |                           |                              |                                                                                                                                                                                                                                                  |
|                                                                        | PG whole cell   |                     |     | 15              |                           |                              |                                                                                                                                                                                                                                                  |
|                                                                        | CL whole cell   |                     |     | 47              |                           |                              |                                                                                                                                                                                                                                                  |
|                                                                        | DAG whole cell  |                     |     | 23              |                           |                              |                                                                                                                                                                                                                                                  |
| <b><i>Staphylococcus aureus</i> (methicillin resistant) (Gram +ve)</b> |                 |                     |     |                 |                           |                              |                                                                                                                                                                                                                                                  |
| DSM 20233 <sup>2</sup>                                                 | PG whole cell   |                     |     | 50              | TLC                       | Difco, antibiotic medium III | Lipoteichoic acid was isolated, but quantitative results were not provided. Information relating to alkyl chain composition not provided.                                                                                                        |
|                                                                        | L-PG whole cell |                     |     | 20              |                           |                              |                                                                                                                                                                                                                                                  |
|                                                                        | CL whole cell   |                     |     | 1               |                           |                              |                                                                                                                                                                                                                                                  |
| USA300 <sup>3</sup>                                                    | PG whole cell   |                     |     | 60              | ESI-MS/MS                 | TSB                          | PC – 30:0 (8 %), 31:0 (9 %), 32:0 (27 %), 33:0 (25 %), 34:0 (11 %), 35:0 (20 %), 36:0 (2 %)<br>L-PG – 30:0 (6 %), 31:0 (5 %), 32:0 (28 %), 33:0 (27 %), 34:0 (18 %), 35:0 (21 %), 36:0 (2 %), 37:0 (1%), 38:1 (2 %)                              |
|                                                                        | L-PG whole cell |                     |     | 30              |                           |                              |                                                                                                                                                                                                                                                  |
|                                                                        | CL whole cell   |                     |     | 2               |                           |                              |                                                                                                                                                                                                                                                  |
|                                                                        | DAG whole cell  |                     |     | 4               |                           |                              |                                                                                                                                                                                                                                                  |
| <i>fakA</i> mutant <sup>3</sup>                                        | PG whole cell   |                     |     | 70              | ESI-MS/MS                 | TSB                          | PC - 30:0 (4 %), 31:0 (5 %), 32:0 (20 %), 33:0 (21 %), 34:0 (16 %), 35:0 (32 %), 36:0 (4 %)<br>L-PG – 30:0 (4 %), 31:0 (3 %), 32:0 (19 %), 33:0 (20 %), 34:0 (15 %), 35:0 (21 %), 36:0 (3 %), 37:0 (2%), 38:1 (2 %)                              |
|                                                                        | L-PG whole cell |                     |     | 25              |                           |                              |                                                                                                                                                                                                                                                  |
|                                                                        | CL whole cell   |                     |     | 1               |                           |                              |                                                                                                                                                                                                                                                  |
|                                                                        | DAG whole cell  |                     |     | 3               |                           |                              |                                                                                                                                                                                                                                                  |
| CB1118<br>(USA400) <sup>4</sup>                                        | PG whole cell   | 84                  |     |                 | 2D TLC, spectrophotometry | MHA                          | Parental strain to produce daptomycin-nonsusceptibility (resistance)<br>Information relating to alkyl chain composition not provided.                                                                                                            |
|                                                                        | L-PG inner      | 11                  |     |                 |                           |                              |                                                                                                                                                                                                                                                  |
|                                                                        | L-PG outer      | 1                   |     |                 |                           |                              |                                                                                                                                                                                                                                                  |
|                                                                        | CL whole cell   | 5                   |     |                 |                           |                              |                                                                                                                                                                                                                                                  |
| CB2205 (20-day DAP-nonsusceptibility) <sup>4</sup>                     | PG whole cell   | 84                  |     |                 | 2D TLC, spectrophotometry | MHA                          | CB2201 – day 1 (O-LPG 11 %, I-LPG 1 %, PG 86 %, CL 4 %)<br>CB2202 – day 5 (O-LPG 12 %, I-LPG 2 %, PG 81 %, CL 9 %)<br>CB2203 – day 14 (O-LPG 15 %, I-LPG 3 %, PG 73 %, CL 13 %)<br>Information relating to alkyl chain composition not provided. |
|                                                                        | L-PG inner      | 19                  |     |                 |                           |                              |                                                                                                                                                                                                                                                  |
|                                                                        | L-PG outer      | 6                   |     |                 |                           |                              |                                                                                                                                                                                                                                                  |
|                                                                        | CL whole cell   | 7                   |     |                 |                           |                              |                                                                                                                                                                                                                                                  |

| <b><i>Staphylococcus auerus</i> (methicillin sensitive) (Gram +ve)</b> |                 |      |           |                     |                     |                                                               |                                                                                                                                                                                                                                                                                                                                                             |
|------------------------------------------------------------------------|-----------------|------|-----------|---------------------|---------------------|---------------------------------------------------------------|-------------------------------------------------------------------------------------------------------------------------------------------------------------------------------------------------------------------------------------------------------------------------------------------------------------------------------------------------------------|
| 209P <sup>5</sup>                                                      | PG whole cell   | 76.5 |           | TLC, radiolabelling | Nutrient broth      | Information relating to alkyl chain composition not provided. |                                                                                                                                                                                                                                                                                                                                                             |
|                                                                        | L-PG whole cell | 16   |           |                     |                     |                                                               |                                                                                                                                                                                                                                                                                                                                                             |
|                                                                        | CL whole cell   | 7    |           |                     |                     |                                                               |                                                                                                                                                                                                                                                                                                                                                             |
| 209P <sup>6</sup>                                                      | PG whole cell   |      | 79.3      | 65.9                | TLC, radiolabelling | Synthetic broth 1                                             | CL – 14:0 (22.2 %), 15:0 (24.6 %), 16:0 (12.1 %), 17:0 (15.6 %), 18:0 (6.8 %), 19:0 (4.7 %), 20:0 (1.3 %), 22:0 (12.3 %)<br>PG – 14:0 (1.2 %), 15:0 (51.0 %), 16:0 (4.8 %), 17:0 (23.2 %), 18:0 (3.2 %), 19:0 (13.9 %), 20:0 (2.9 %)<br>L-PG – 14:0 (4.7 %), 15:0 (37.0 %), 16:0 (4.1 %), 17:0 (25.0 %), 18:0 (4.9 %), 19:0 (13.5 %), 20:0 (7.1 %)          |
|                                                                        | L-PG whole cell |      | 14.3      | 10                  |                     |                                                               |                                                                                                                                                                                                                                                                                                                                                             |
|                                                                        | CL whole cell   |      | 3.6       | 13.7                |                     |                                                               |                                                                                                                                                                                                                                                                                                                                                             |
| U-71 <sup>7</sup>                                                      | PG whole cell   | 80   |           |                     | TLC, radiolabelling | Synthetic media 2                                             | Information relating to alkyl chain composition not provided.                                                                                                                                                                                                                                                                                               |
|                                                                        | L-PG whole cell | 12   |           |                     |                     |                                                               |                                                                                                                                                                                                                                                                                                                                                             |
|                                                                        | CL whole cell   | 5    |           |                     |                     |                                                               |                                                                                                                                                                                                                                                                                                                                                             |
| <b><i>Klebsiella pneumonia</i> (Gram -ve)</b>                          |                 |      |           |                     |                     |                                                               |                                                                                                                                                                                                                                                                                                                                                             |
| Smooth mutant <sup>8</sup>                                             | PE whole cell   | 82   |           |                     | TLC, radiolabelling | Synthetic media 3                                             | Information relating to alkyl chain composition not provided.                                                                                                                                                                                                                                                                                               |
|                                                                        | PG whole cell   | 4.5  |           |                     |                     |                                                               |                                                                                                                                                                                                                                                                                                                                                             |
|                                                                        | PA whole cell   | 5    |           |                     |                     |                                                               |                                                                                                                                                                                                                                                                                                                                                             |
|                                                                        | CL whole cell   | 6.5  |           |                     |                     |                                                               |                                                                                                                                                                                                                                                                                                                                                             |
| 005 <sup>9</sup>                                                       | PG whole cell   | 35   |           |                     | FAB-MS              | Nutrient broth                                                | PG – 27:3 (3.7 %), 28:3 (1.4 %), 29:4 (0.4 %), 29:3 (2.7 %), 29:2 (0.3 %), 30:2 (5.2 %), 31:3 (4.8 %), 31:2 (4.3 %), 32:4 (4.2 %), 32:3 (4.1 %), 32:2 (3.9 %), 34:3 (5.9 %)<br>PE – 30:1 (2.4 %), 31:1 (4.2 %), 32:2 (4.6 %), 32:1 (15.9 %), 32:0 (3.6 %), 33:1 (6.8 %), 34:2 (9.4 %), 34:1 (1.3 %), 34:0 (5.3 %), 35:2 (0.7 %), 35:1 (4.5 %), 36:1 (0.3 %) |
|                                                                        | PE whole cell   | 59   |           |                     |                     |                                                               |                                                                                                                                                                                                                                                                                                                                                             |
| <b><i>Acinetobacter baumannii</i> (Gram -ve)</b>                       |                 |      |           |                     |                     |                                                               |                                                                                                                                                                                                                                                                                                                                                             |
| ATCC17978 <sup>10</sup>                                                | PE whole cell   |      |           |                     | LC-MS               | G56 minimal                                                   | PG – 16:0/18:3, 18:1/18:3, 16:0/22:6<br>PE – 16:0/18:3, 18:1/18:3, 16:0/22:6, 18:1/22:6                                                                                                                                                                                                                                                                     |
|                                                                        | PG whole cell   |      |           |                     |                     |                                                               |                                                                                                                                                                                                                                                                                                                                                             |
|                                                                        | CL whole cell   |      |           |                     |                     |                                                               |                                                                                                                                                                                                                                                                                                                                                             |
| H01-N <sup>11</sup>                                                    | PE CM           | 70   |           |                     | TLC/GC              | Non-specific broth                                            | Information relating to alkyl chain composition not provided.                                                                                                                                                                                                                                                                                               |
|                                                                        | PE OM           | 51   |           |                     |                     |                                                               |                                                                                                                                                                                                                                                                                                                                                             |
|                                                                        | L-PE CM         | 3    |           |                     |                     |                                                               |                                                                                                                                                                                                                                                                                                                                                             |
|                                                                        | L-PE outer      | 3    |           |                     |                     |                                                               |                                                                                                                                                                                                                                                                                                                                                             |
|                                                                        | CL CM           | 7    |           |                     |                     |                                                               |                                                                                                                                                                                                                                                                                                                                                             |
|                                                                        | CL outer        | 19   |           |                     |                     |                                                               |                                                                                                                                                                                                                                                                                                                                                             |
|                                                                        | L-CL CM         | 10   |           |                     |                     |                                                               |                                                                                                                                                                                                                                                                                                                                                             |
|                                                                        | L-CL outer      | 15   |           |                     |                     |                                                               |                                                                                                                                                                                                                                                                                                                                                             |
|                                                                        | PG CM           | 10   |           |                     |                     |                                                               |                                                                                                                                                                                                                                                                                                                                                             |
|                                                                        | PG outer        | 11   |           |                     |                     |                                                               |                                                                                                                                                                                                                                                                                                                                                             |
| <b><i>Pseudomonas aeruginosa</i> (Gram -ve)</b>                        |                 |      |           |                     |                     |                                                               |                                                                                                                                                                                                                                                                                                                                                             |
| PAO1 <sup>12</sup>                                                     | PC whole cell   |      | 32-30 [a] | 5-17 [b]            | LC-MS               | LB                                                            | PC – 35:1, 35:2,                                                                                                                                                                                                                                                                                                                                            |

|                                                                   |               |      |           |           |          |                  |                                                                                                                                                                                                                                                                                                                                                                                                                                                                                               |
|-------------------------------------------------------------------|---------------|------|-----------|-----------|----------|------------------|-----------------------------------------------------------------------------------------------------------------------------------------------------------------------------------------------------------------------------------------------------------------------------------------------------------------------------------------------------------------------------------------------------------------------------------------------------------------------------------------------|
|                                                                   | PE whole cell |      | 32-30 [a] | 5-17 [b]  |          |                  | PE – 16:0/17:1, 16:0/19:1, 16:1/19:1, 17:1/18:1, 17:1/19:1,<br>PG – 16:0/17:1, 16:0/19:1, 17:1/18:1, 17:1/19:1<br>PC - 32:0, 32:1, 34:2<br>PE - 16:0/16:0, 16:0/16:1, 16:1/18:1, 18:1/18:1<br>PG - 16:0/16:0, 16:0/18:1, 16:1/18:1<br>Lipids that were present, but had different profiles: PC - 34:1, PE - 14:0/18:1,<br>15:0/18:1, 16:0/16:0/18:1, PG - 16:1/19:1, 18:0/18:1                                                                                                                |
|                                                                   | PG whole cell |      | 32-30 [a] | 5-17 [b]  |          |                  |                                                                                                                                                                                                                                                                                                                                                                                                                                                                                               |
|                                                                   | PC whole cell |      | 6-13 [a]  | 33-13 [b] |          |                  |                                                                                                                                                                                                                                                                                                                                                                                                                                                                                               |
|                                                                   | PE whole cell |      | 6-13 [a]  | 33-13 [b] |          |                  |                                                                                                                                                                                                                                                                                                                                                                                                                                                                                               |
|                                                                   | PG whole cell |      | 6-13 [a]  | 33-13 [b] |          |                  |                                                                                                                                                                                                                                                                                                                                                                                                                                                                                               |
| PAO1 (outer membrane) <sup>13</sup>                               | PE whole cell |      | 60        | 33 [c]    | TLC      | LB               | Information relating to alkyl chain composition not provided.                                                                                                                                                                                                                                                                                                                                                                                                                                 |
|                                                                   | PG whole cell |      | 27        | 63 [c]    |          |                  |                                                                                                                                                                                                                                                                                                                                                                                                                                                                                               |
|                                                                   | PC whole cell |      | 13        | 3.9 [c]   |          |                  |                                                                                                                                                                                                                                                                                                                                                                                                                                                                                               |
| B-219 <sup>14</sup>                                               | PA whole cell | 0.1  |           |           | LC-MS/MS | Universal medium | PA – 34:1 (0.1 %)<br>PE – 32:0 (4 %), 32:1 (18 %), 32:2 (2 %), 33:1 (19 %), 33:2 (3 %), 34:1 (8 %),<br>34:2 (5 %), 36:2 (4 %)<br>PG – 31:2 (3 %), 32:1 (5 %), 32:2 (4 %), 33:1 (19 %), 34:2 (10 %), 35:2 (6 %),<br>36:2 (2 %)                                                                                                                                                                                                                                                                 |
|                                                                   | PE whole cell | 59   |           |           |          |                  |                                                                                                                                                                                                                                                                                                                                                                                                                                                                                               |
|                                                                   | PG whole cell | 41   |           |           |          |                  |                                                                                                                                                                                                                                                                                                                                                                                                                                                                                               |
| PAK (MHB) <sup>15</sup>                                           | PC            |      | 2.2 [d]   |           |          | MH               | PC – 32:0, 32:1, 34:1, 34:2, 36:1<br>PE – 32:1 34:1, 36:2<br>PG – 22:1, 34:1, 36:2<br>CL – 66.2, 70.3                                                                                                                                                                                                                                                                                                                                                                                         |
|                                                                   | PE            |      | 17.9 [d]  |           |          |                  |                                                                                                                                                                                                                                                                                                                                                                                                                                                                                               |
|                                                                   | PG            |      | 6.7 [d]   |           |          |                  |                                                                                                                                                                                                                                                                                                                                                                                                                                                                                               |
|                                                                   | CL            |      | 1.0 [d]   |           |          |                  |                                                                                                                                                                                                                                                                                                                                                                                                                                                                                               |
| PAK (SCFM) <sup>15</sup>                                          | PC            |      | 0 [d]     |           |          | SCFM             | PC – 32:0, 32:1, 34:1, 34:2, 36:1<br>PE – 32:1 34:1, 36:2<br>PG – 22:1, 34:1, 36:2<br>CL – 66.2, 70.3                                                                                                                                                                                                                                                                                                                                                                                         |
|                                                                   | PE            |      | 13.6 [d]  |           |          |                  |                                                                                                                                                                                                                                                                                                                                                                                                                                                                                               |
|                                                                   | PG            |      | 7.4 [d]   |           |          |                  |                                                                                                                                                                                                                                                                                                                                                                                                                                                                                               |
|                                                                   | CL            |      | 0.8 [d]   |           |          |                  |                                                                                                                                                                                                                                                                                                                                                                                                                                                                                               |
| PAK (SCFM-PC) <sup>15</sup>                                       | PC            |      | 22.0 [d]  |           |          | SCFM-PC          | PC – 32:0, 32:1, 34:1, 34:2, 36:1<br>PE – 32:1 34:1, 36:2<br>PG – 22:1, 34:1, 36:2<br>CL – 66.2, 70.3                                                                                                                                                                                                                                                                                                                                                                                         |
|                                                                   | PE            |      | 24.9 [d]  |           |          |                  |                                                                                                                                                                                                                                                                                                                                                                                                                                                                                               |
|                                                                   | PG            |      | 15.5 [d]  |           |          |                  |                                                                                                                                                                                                                                                                                                                                                                                                                                                                                               |
|                                                                   | CL            |      | 1.1 [d]   |           |          |                  |                                                                                                                                                                                                                                                                                                                                                                                                                                                                                               |
| <b><i>Enterobacter cloacae</i> (<i>E. cloacae</i>) (Gram -ve)</b> |               |      |           |           |          |                  |                                                                                                                                                                                                                                                                                                                                                                                                                                                                                               |
| <i>E. cloacae</i> (012) <sup>9</sup>                              | PE whole cell | 65   |           |           | FAB-MS   | Nutrient broth   | PE – 30:0 (3.0 %), 32:2 (6.3 %), 32:1 (20.2 %), 32:0 (0.9 %), 33:1 (6.1 %),<br>33:0 (1.3 %), 34:2 (9.9 %), 34:1 (12.3 %), 35:2 (1.7 %), 35:1 (2.4 %)<br>PG – 27:3 (5.0 %), 28:3 (3.0 %), 29:4 (2.8 %), 29:3 (1.6 %), 30:2 (7.7 %), 31:2 (8 %),<br>32:3 (1.0 %), 32:2 (3.7 %), 32:1 (0.9 %), 34:1 (1.1%)                                                                                                                                                                                       |
|                                                                   | PG whole cell | 35   |           |           |          |                  |                                                                                                                                                                                                                                                                                                                                                                                                                                                                                               |
| <i>E. cloacae</i> (008) <sup>9</sup>                              | PE whole cell | 50.3 |           |           | FAB-MS   | Nutrient broth   | PE – 30:1 (1.4 %), 30:0 (1.5 %), 31:1 (1.1 %) 32:2 (4.3 %), 32:1 (13.8 %),<br>32:0 (6.1 %), 33:1 (2.6 %), 34:2 (7.3 %), 34:1 (7.4 %), 34:0 (2.2 %), 35:2 (1.2 %),<br>35:1 (0.8 %), 38:0 (0.6 %)<br>PG – 27:3 (2.1 %), 28:3 (0.7 %), 29:4 (1.5 %), 29:3 (1.9 %), 30:2 (6.6 %),<br>30:1 (0.7 %), 31:2 (7.6 %), 32:3 (0.5 %), 32:2 (5.9 %), 32:1 (2.3 %), 33:3 (0.8 %),<br>33:2 (1.6 %), 33:1 (1.4 %), 34:3 (2.8 %), 34:2 (2.3 %), 34:1 (3.3 %)<br>PS – 34:1 (4.1 %), 32:0 (0.4 %), 33:0 (3.2 %) |
|                                                                   | PG whole cell | 42   |           |           |          |                  |                                                                                                                                                                                                                                                                                                                                                                                                                                                                                               |
|                                                                   | PS whole cell | 7.7  |           |           |          |                  |                                                                                                                                                                                                                                                                                                                                                                                                                                                                                               |
| <i>E. cloacae</i> S <sub>w1</sub> <sup>16</sup>                   | PE CM         |      | 73        |           | TLC      | Soy broth        | Information relating to alkyl chain composition not provided.                                                                                                                                                                                                                                                                                                                                                                                                                                 |

|                                            |                 |    |           |                            |                   |                                                                                   |
|--------------------------------------------|-----------------|----|-----------|----------------------------|-------------------|-----------------------------------------------------------------------------------|
|                                            | PE OM           |    | 77        |                            |                   |                                                                                   |
|                                            | L-PE CM         |    | 0.4       |                            |                   |                                                                                   |
|                                            | L-PE OM         |    | 9         |                            |                   |                                                                                   |
|                                            | PG CM           |    | 23        |                            |                   |                                                                                   |
|                                            | PG OM           |    | 6         |                            |                   |                                                                                   |
|                                            | CL CM           |    | 3.6       |                            |                   |                                                                                   |
|                                            | CL OM           |    | 8         |                            |                   |                                                                                   |
| <i>E. cloacae</i><br>AZT-R <sup>16</sup>   | PE CM           |    | 80        | TLC                        | Soy broth         | Information relating to alkyl chain composition not provided.                     |
|                                            | PE OM           |    | 7         |                            |                   |                                                                                   |
|                                            | L-PE CM         |    | 1         |                            |                   |                                                                                   |
|                                            | L-PE OM         |    | 10        |                            |                   |                                                                                   |
|                                            | PG CM           |    | 17        |                            |                   |                                                                                   |
|                                            | PG OM           |    | 5         |                            |                   |                                                                                   |
|                                            | CL CM           |    | 2         |                            |                   |                                                                                   |
|                                            | CL OM           |    | 9         |                            |                   |                                                                                   |
| <i>E. cloacae</i><br>AMA-R <sup>16</sup>   | PE CM           |    | 79        | TLC                        | Soy broth         | Information relating to alkyl chain composition not provided.                     |
|                                            | PE OM           |    | 82        |                            |                   |                                                                                   |
|                                            | L-PE CM         |    | 1         |                            |                   |                                                                                   |
|                                            | L-PE OM         |    | 6         |                            |                   |                                                                                   |
|                                            | PG CM           |    | 17        |                            |                   |                                                                                   |
|                                            | PG OM           |    | 5         |                            |                   |                                                                                   |
|                                            | CL CM           |    | 2         |                            |                   |                                                                                   |
|                                            | CL OM           |    | 6         |                            |                   |                                                                                   |
| <b><i>Bacillus subtilis</i> (Gram +ve)</b> |                 |    |           |                            |                   |                                                                                   |
| I'1a <sup>17</sup>                         | PG whole cell   | 70 | 75        | LC-MS/MS                   | LB                | PE – 28:0 (2 %), 29:0 (4 %), 30:0 (6 %), 32:1 (1 %), 32:0 (2 %), 33:0 (2 %)       |
|                                            | PE whole cell   | 22 | 17        |                            |                   | PG – 29:0 (5 %), 30:0 (38 %), 31:0 (15 %), 32:0 (15 %)                            |
|                                            | CL whole cell   | 4  | 7         |                            |                   | CL – 61:0 (1 %), 62:0 (1 %), 63:0 (1 %), 64:0 (1 %)                               |
|                                            | L-PG whole cell | 3  | 2         |                            |                   | L-PG – 32:0 (3 %)                                                                 |
| DSM 3257 <sup>17</sup>                     | PG whole cell   | 65 | 30        | LC-MS/MS                   | LB                | PE – 28:0 (4 %), 29:0 (10 %), 30:0 (9 %), 32:1 (5 %), 32:0 (2 %), 33:0 (4 %)      |
|                                            | PE whole cell   | 35 | 70        |                            |                   | PG – 29:0 (11 %), 30:0 (24 %), 31:0 (9 %), 32:0 (9 %)                             |
|                                            | CL whole cell   | 4  | 10        |                            |                   | CL – 61:0 (1 %), 62:0 (1 %), 63:0 (1 %), 64:0 (1 %)                               |
|                                            | L-PG whole cell | 2  | 2         |                            |                   | L-PG – 32:0 (2 %)                                                                 |
| <b><i>Escherichia coli</i> (Gram -ve)</b>  |                 |    |           |                            |                   |                                                                                   |
| B <sup>18</sup>                            | PE whole cell   | 75 | decreases | TLC/radioactivity          | LB                | Information relating to alkyl chain composition not provided.                     |
|                                            | PG whole cell   | 20 | 9         |                            |                   |                                                                                   |
|                                            | CL whole cell   | 5  | 50        |                            |                   |                                                                                   |
| BL21AI Api <sup>19</sup>                   | PE (odd)        |    | decreased | RP-HPLC-ESI-<br>iontrap-MS | TSB/M9<br>minimal | PE – 28:0, 30:1, 30:0, 32:1, 33:1, 34:1, 35:1, 34:2, 35:2, 36:2                   |
|                                            | PG (odd)        |    | decreased |                            |                   | PG – 30:0, 32:1, 33:1, 34:1, 35:1, 34:2, 35:2, 36:2, 37:2                         |
|                                            | Lipid A         |    |           |                            |                   | No change in quantity of lipid A between wild type and resistant <i>E. coli</i> . |

[a] – From 0 minutes to 20 minutes.

[b] – From 3 hours to 24 hours.

[c] – Membrane vesicles.

[d] – Relative area under mass spec peak.

Table S2 – Phospholipid membrane composition in cancer samples.

|                    | Phospholipid                                                                                                                                                                                                                                                                                                                                                                                                                                                                                                                                                                                                                                                                                                                                                  | Cancer vs control                                                                                                                                                                                                    | Method                                                                                                        | Control comparison                                                                                                                                                                                                                                                                                                                                                           |                                                                                                                                                                                    |
|--------------------|---------------------------------------------------------------------------------------------------------------------------------------------------------------------------------------------------------------------------------------------------------------------------------------------------------------------------------------------------------------------------------------------------------------------------------------------------------------------------------------------------------------------------------------------------------------------------------------------------------------------------------------------------------------------------------------------------------------------------------------------------------------|----------------------------------------------------------------------------------------------------------------------------------------------------------------------------------------------------------------------|---------------------------------------------------------------------------------------------------------------|------------------------------------------------------------------------------------------------------------------------------------------------------------------------------------------------------------------------------------------------------------------------------------------------------------------------------------------------------------------------------|------------------------------------------------------------------------------------------------------------------------------------------------------------------------------------|
| <b>Lung cancer</b> |                                                                                                                                                                                                                                                                                                                                                                                                                                                                                                                                                                                                                                                                                                                                                               |                                                                                                                                                                                                                      |                                                                                                               |                                                                                                                                                                                                                                                                                                                                                                              |                                                                                                                                                                                    |
| NSCLC Tissue       | PC - 32:3, 34:1, 36:2, 36:3 <sup>20</sup><br>SM - 16:0 <sup>20</sup>                                                                                                                                                                                                                                                                                                                                                                                                                                                                                                                                                                                                                                                                                          | Upregulated<br>Upregulated                                                                                                                                                                                           | MALDI-MS<br>MALDI-MS                                                                                          | Adjacent normal lung tissue – 2 cm apart<br>Adjacent normal lung tissue – 2 cm apart                                                                                                                                                                                                                                                                                         |                                                                                                                                                                                    |
|                    | PC - 40:4, 40:5, 40:6, 40:7, 42:5, 42:6, 42:7, 42:8, 42:9 <sup>21</sup><br>PE - 38:3, 40:3, 40:4, 40:5, 40:6, 42:6, 42:7, 42:8, 42:9, 44:12 <sup>21</sup><br>PI - 36:4, 38:2, 38:3, 38:4, 40:3, 40:4, 40:5, 42:2 <sup>21</sup><br>PS - 42:9, 44:9 <sup>21</sup><br>PI - 32:0, 34:0, 34:1, 36:1, 36:2, 38:6 <sup>21</sup><br>PC - 28:1, 32:0, 32:1, 32:3, 34:0, 34:2, 34:3, 34:4, 36:5, 36:6, 40:8, 44:3, 44:9, 44:10 <sup>21</sup><br>PE - 32:0, 34:0, 34:3, 34:4, 36:3, 36:4, 36:5, 38:1, 38:7 <sup>21</sup><br>PS - 32:0, 32:1, 34:0, 34:1, 34:2, 34:3 36:1, 36:2, 36:3, 36:4, 38:1, 38:2, 38:3, 38:4, 38:5, 38:6, 38:7, 40:1, 40:2, 40:7, 40:8, 42:2, 42:3, 42:4, 42:5, 42:8 <sup>21</sup><br>SM - 34:1, 34:2, 36:1, 36:2, 40:1, 42:1, 42:2 <sup>21</sup>  | Upregulated<br>Upregulated<br>Upregulated<br>Upregulated<br>Downregulated<br>Downregulated<br>Downregulated<br>Downregulated                                                                                         | ESI-MS<br>ESI-MS<br>ESI-MS<br>ESI-MS<br>ESI-MS<br>ESI-MS<br>ESI-MS<br>ESI-MS                                  | Matched distant lung tissue – > 5 cm apart<br>Matched distant lung tissue – > 5 cm apart |                                                                                                                                                                                    |
|                    | PC - 32:2, 32:3-1, 32:3-2, 33:1, 33:2, 34:3, 34:4, 35:2, 35:3, 36:1, 36:2, 36:3, 36:4-1, 36:4-2, 36:5, 38:1, 38:2, 38:3, 38:4, 38:5, 38:6 <sup>22</sup><br>PE - 32:0, 32:1, 34:0, 34:1, 34:2, 36:3, 36:4, 38:1, 38:4, 38:6 <sup>22</sup><br>LPA - 18:1(9Z)/0:0 <sup>22</sup><br>LPC - 14:0sn-1, 14:0sn-2, 15:0sn-1, 15:0sn-2, 16:0sn-1, 16:0sn-2, 16:1sn-1, 17:0sn-1, 18:0sn-1, 18:1sn-1, 18:1sn-2, 18:2sn-1, 19:0sn-1, 20:1sn-1, 20:1sn-2, 20:5sn-1, 22:4sn-1, 22:4sn-2, 22:5sn-1, 22:6sn-1 <sup>22</sup><br>LPE - 16:0sn-1, 16:0sn-2, 16:1sn-1, 18:0sn-1, 18:0sn-2, 18:1sn-1, 18:1sn-2, 18:2sn-2, 20:0sn-1, 20:1sn-1, 20:2sn-1, 20:2sn-2, 20:3sn-1, 20:4sn-2, 20:5sn-1, 22:4sn-2, 22:6sn-1, 22:6sn-2 <sup>22</sup><br>Sphingosine-1-phosphate <sup>22</sup> | Upregulated<br>Upregulated<br>Upregulated<br>Upregulated<br>Upregulated<br>Upregulated                                                                                                                               | LC-MS<br>LC-MS<br>LC-MS<br>LC-MS<br>LC-MS<br>LC-MS                                                            | Distal noncancerous tissue<br>Distal noncancerous tissue<br>Distal noncancerous tissue<br>Distal noncancerous tissue<br>Distal noncancerous tissue<br>Distal noncancerous tissue                                                                                                                                                                                             |                                                                                                                                                                                    |
|                    | Tissue                                                                                                                                                                                                                                                                                                                                                                                                                                                                                                                                                                                                                                                                                                                                                        | PC - 34:1, 36:1 <sup>23</sup><br>PA - 36:2 <sup>23</sup><br>PC - 38:6 <sup>23</sup><br>PE - 38:4 <sup>23</sup><br>PI - 38:4 <sup>23</sup><br>SM - 22:0, 24:1 <sup>23</sup><br>PC - 16:0/18:1, 34:1/Na <sup>+24</sup> | Upregulated<br>Upregulated<br>Downregulated<br>Downregulated<br>Downregulated<br>Downregulated<br>Upregulated | MS<br>MS<br>MS<br>MS<br>MS<br>MS<br>MSI                                                                                                                                                                                                                                                                                                                                      | Adjacent normal tissue<br>Adjacent normal tissue<br>Adjacent normal tissue<br>Adjacent normal tissue<br>Adjacent normal tissue<br>Adjacent normal tissue<br>Adjacent normal tissue |
|                    | Adenocarcinoma Tissue                                                                                                                                                                                                                                                                                                                                                                                                                                                                                                                                                                                                                                                                                                                                         | PC - 16:0/18:1, (16:0/16:1)/(16:0/16:0), (16:0/18:1)/(16:0/18:0), (16:0/18:1)/(16:0/16:0), 36:4 <sup>25</sup><br>PC - 16:0/16:0 <sup>25</sup>                                                                        | Upregulated<br>Downregulated                                                                                  | LC-MS<br>LC-MS                                                                                                                                                                                                                                                                                                                                                               | Normal lung tissue<br>Normal lung tissue                                                                                                                                           |

|                      | SM - 42:2 <sup>25</sup>                                                                                                                                                                                                                                                                                                                                                                                                                                                                                                    | Downregulated                                                                                                                | LC-MS                                                                                                                                           | Normal lung tissue                                                                                                                                           |
|----------------------|----------------------------------------------------------------------------------------------------------------------------------------------------------------------------------------------------------------------------------------------------------------------------------------------------------------------------------------------------------------------------------------------------------------------------------------------------------------------------------------------------------------------------|------------------------------------------------------------------------------------------------------------------------------|-------------------------------------------------------------------------------------------------------------------------------------------------|--------------------------------------------------------------------------------------------------------------------------------------------------------------|
| <b>Breast cancer</b> |                                                                                                                                                                                                                                                                                                                                                                                                                                                                                                                            |                                                                                                                              |                                                                                                                                                 |                                                                                                                                                              |
| Cell lines[e]        | PC - 32:1, 34:0, 38:5, 38:6 <sup>26</sup><br>PE - 32:1, 34:0, 34:1, 34:2, 36:0, 36:4, 38:1, 38.5, 38:6, 40:5, 40:6 <sup>26</sup><br>PI - 32:0, 32:1, 34:0, 34:1, 38:5, 40:6 <sup>26</sup><br>SM - 36:2, 36:3, 41:1 <sup>26</sup><br>PE - 34:5 <sup>26</sup><br>PI - 38:3 <sup>26</sup><br>SM - 40:1 <sup>26</sup>                                                                                                                                                                                                          | Upregulated<br>Upregulated<br>Upregulated<br>Upregulated<br>Downregulated<br>Downregulated<br>Downregulated                  | HILIC-HPLC/ESI-MS<br>HILIC-HPLC/ESI-MS<br>HILIC-HPLC/ESI-MS<br>HILIC-HPLC/ESI-MS<br>HILIC-HPLC/ESI-MS<br>HILIC-HPLC/ESI-MS<br>HILIC-HPLC/ESI-MS | MCF10A Cell line<br>MCF10A Cell line<br>MCF10A Cell line<br>MCF10A Cell line<br>MCF10A Cell line<br>MCF10A Cell line<br>MCF10A Cell line                     |
| T-47D                | PC - 14:0/18:1 <sup>26</sup><br>PE - 16:1/18:0, 16:0/18:1, 18:0/18:2, 18:1/18:1 <sup>26</sup><br>PI - 18:1/18:1, 18:2/18:0, 18:0/18:1 <sup>26</sup><br>CL - 16:1/18:1/18:1/18:2 <sup>26</sup><br>PC - 18:1/18:1, 18:0/18:1 <sup>26</sup><br>PI - 22.5/18:0 <sup>26</sup><br>CL - 16:1/18:1/18:2/20:3, 18:2/18:2/18:2/20:2 <sup>26</sup><br>SM - 18:1/22:0, 18:1/24.1, 18:1/24:0 <sup>26</sup>                                                                                                                              | Upregulated<br>Upregulated<br>Upregulated<br>Upregulated<br>Downregulated<br>Downregulated<br>Downregulated<br>Downregulated | TLC, ESI-MS<br>TLC, ESI-MS<br>TLC, ESI-MS<br>TLC, ESI-MS<br>TLC, ESI-MS<br>TLC, ESI-MS<br>TLC, ESI-MS<br>TLC, ESI-MS                            | MCF10A cell line<br>MCF10A cell line |
| MDA-MB-231           | PC - 14:0/18:1, 16:0/16:1, 18:1/18:1, 18:0/18:1 <sup>26</sup><br>PI - 18:1/18:1, 18:2/18:0, 18:0/18:1, 22.5/18:0 <sup>26</sup><br>SM - 18:1/22:0, 18:24:0 <sup>26</sup>                                                                                                                                                                                                                                                                                                                                                    | Upregulated<br>Upregulated<br>Upregulated                                                                                    | TLC, ESI-MS<br>TLC, ESI-MS<br>TLC, ESI-MS                                                                                                       | MCF10A cell line<br>MCF10A cell line<br>MCF10A cell line                                                                                                     |
|                      | PC - 16:1/18:1, 18:1/18:2, 18:1/18:1, 18:2/20:3, 18:0/20:4, 18:0/20:0, 18:1/20:0, 18:1/22:5 <sup>27</sup><br>PE - 17:0/19:0, 18:1/20:4, 18:1/22:4 <sup>27</sup><br>PI - 16:0/16:1, 16:1/18:1, 16:0/18:1, 16:0/22:6, 18:1/20:4, 18:0/20:4, 18:0/20:3 <sup>27</sup><br>PS - 16:1/18:1, 16:0/18:0, 16:0/18:1, 17:0/18:1, 18:0/18:0, 18:1/20:0, 18:0/22:6, 18:1/22:4, 18:1/22:0 <sup>27</sup><br>PE - 18:1/18:1 <sup>27</sup><br>PG - 16:0/18:1, 18:1/18:1 <sup>27</sup><br>PI - 18:1/18:1, 18:0/18:1 <sup>27</sup>            | Upregulated<br>Upregulated<br>Upregulated<br>Upregulated<br>Downregulated<br>Downregulated<br>Downregulated                  | DI-MS<br>DI-MS<br>DI-MS<br>DI-MS<br>DI-MS<br>DI-MS<br>DI-MS                                                                                     | MCF10A cell line<br>MCF10A cell line<br>MCF10A cell line<br>MCF10A cell line<br>MCF10A cell line<br>MCF10A cell line<br>MCF10A cell line                     |
| MCF-7                | PC - 16:1/18:1, 18:1/18:2, 18:1/18:1, 18:2/20:3, 18:0/20:4, 18:1/20:1, 18:1/20:0, 18:1/22:5 <sup>27</sup><br>PE - 18:1/18:1, 17:0/19:0, 18:1/20:4, 18:1/22:4 <sup>27</sup><br>PG - 16:0/18:1, 18:1/18:1 <sup>27</sup><br>PI - 16:0/16:1, 16:1/18:1, 16:0/18:1, 18:1/20:4 <sup>27</sup><br>PS - 16:1/18:1, 16:0/18:0, 16:0/18:1, 17:0/18:1, 18:0/18:0, 18:1/20:0, 18:0/22:6, 18:1/22:4, 18:1/22:0 <sup>27</sup><br>PI - 18:1/18:1, 18:0/20:4, 18:0/20:3 <sup>27</sup><br>PS - 18:1/18:2, 18:0/18:1, 18:1/22:1 <sup>27</sup> | Upregulated<br>Upregulated<br>Upregulated<br>Upregulated<br>Upregulated<br>Downregulated<br>Downregulated                    | DI-MS<br>DI-MS<br>DI-MS<br>DI-MS<br>DI-MS<br>DI-MS<br>DI-MS                                                                                     | MCF10A cell line<br>MCF10A cell line<br>MCF10A cell line<br>MCF10A cell line<br>MCF10A cell line<br>MCF10A cell line<br>MCF10A cell line                     |



|                                   |                                                                                                                                                                                                                                                                                                                                                                 |                                                                                                                                                                                                                       |                                                                                                                                                              |                                                                                                                                                                                                               |
|-----------------------------------|-----------------------------------------------------------------------------------------------------------------------------------------------------------------------------------------------------------------------------------------------------------------------------------------------------------------------------------------------------------------|-----------------------------------------------------------------------------------------------------------------------------------------------------------------------------------------------------------------------|--------------------------------------------------------------------------------------------------------------------------------------------------------------|---------------------------------------------------------------------------------------------------------------------------------------------------------------------------------------------------------------|
| Tissue                            | PC <sup>28</sup><br>PE <sup>28</sup><br>PI <sup>28</sup><br>SM <sup>28</sup>                                                                                                                                                                                                                                                                                    | Upregulated<br>Upregulated<br>Upregulated<br>Upregulated                                                                                                                                                              | UPLC-MS<br>UPLC-MS<br>UPLC-MS<br>UPLC-MS                                                                                                                     | Adjacent normal tissue<br>Adjacent normal tissue<br>Adjacent normal tissue<br>Adjacent normal tissue                                                                                                          |
| Tissue                            | PC - 38:6 <sup>29</sup><br>PE - 34:1, PE 36:1 <sup>29</sup><br>PI - 36:4 <sup>29</sup><br>SM - 34:1 <sup>29</sup>                                                                                                                                                                                                                                               | Upregulated<br>Upregulated<br>Upregulated<br>Downregulated                                                                                                                                                            | HILIC-HPLC/ESI-MS<br>HILIC-HPLC/ESI-MS<br>HILIC-HPLC/ESI-MS<br>HILIC-HPLC/ESI-MS-<br>MALDI- MS                                                               | Normal breast tissue<br>Normal breast tissue<br>Normal breast tissue<br>Normal breast tissue                                                                                                                  |
|                                   | PC - 32:0, 34:1 <sup>30</sup><br>SM - d18:1/16:0 <sup>30</sup>                                                                                                                                                                                                                                                                                                  | Upregulated<br>Upregulated                                                                                                                                                                                            | MALDI-MS<br>MALDI-MS                                                                                                                                         | Adjacent normal breast tissue<br>Adjacent normal breast tissue                                                                                                                                                |
|                                   | Sphingosine, sphingosine-1-phosphate, dihydro-sphingosine,<br>dihydro-sphingosine-1-phosphate <sup>31</sup>                                                                                                                                                                                                                                                     | Upregulated                                                                                                                                                                                                           | LC-ESI-MS/MS                                                                                                                                                 | Normal breast tissue                                                                                                                                                                                          |
|                                   | PC - 32:1, 34:1, 36:1 <sup>23</sup><br>PA - 36:2 <sup>23</sup><br>PC - 38:4, 38:6 <sup>23</sup><br>PA - 38:3, 40:5 <sup>23</sup><br>PE - 38:4 <sup>23</sup><br>PI - 38:4 <sup>23</sup><br>SM - 22:0, 24:1 <sup>23</sup>                                                                                                                                         | Upregulated<br>Upregulated<br>Downregulated<br>Downregulated<br>Downregulated<br>Downregulated<br>Downregulated                                                                                                       | MS<br>MS<br>MS<br>MS<br>MS<br>MS<br>MS                                                                                                                       | Adjacent normal tissue<br>Adjacent normal tissue<br>Adjacent normal tissue<br>Adjacent normal tissue<br>Adjacent normal tissue<br>Adjacent normal tissue<br>Adjacent normal tissue                            |
| <b>Prostate cancer</b>            |                                                                                                                                                                                                                                                                                                                                                                 |                                                                                                                                                                                                                       |                                                                                                                                                              |                                                                                                                                                                                                               |
| Cell lines DU145,<br>22RV1, LNCaP | PC - 32:1, 34:1 <sup>32</sup><br>PC - 36:2 <sup>32</sup><br>PE - 18:1/16:0 <sup>32</sup><br>PE - 18:1/18:1 <sup>32</sup><br>SM - 18:1/20:0 <sup>32</sup><br>SM - 18:1/16:0 <sup>32</sup><br>SM - 18:1/22:0 <sup>32</sup><br>PC - 32:1, 34:1 <sup>32</sup><br>PC - 36:2 <sup>32</sup><br>PE - 18:1/16:0 <sup>32</sup><br>SM - 18:1/20:0, 18:1/22:0 <sup>32</sup> | Upregulated [f]<br>Upregulated [g]<br>Upregulated [h]<br>Upregulated [i]<br>Upregulated [f]<br>Upregulated [h]<br>Upregulated [g]<br>Downregulated [j]<br>Downregulated [k]<br>Downregulated [l]<br>Downregulated [j] | LC-ESI-MS/MS<br>LC-ESI-MS/MS<br>LC-ESI-MS/MS<br>LC-ESI-MS/MS<br>LC-ESI-MS/MS<br>LC-ESI-MS/MS<br>LC-ESI-MS/MS<br>LC-ESI-MS/MS<br>LC-ESI-MS/MS<br>LC-ESI-MS/MS | Cell line PNT1a<br>Cell line PNT1a |
| Tissue                            | PI - 18:0/18:1, 18:0/20:3, 18:0/20:2 <sup>33</sup><br>LPC - 16:0/OH <sup>34</sup><br>PE - 44:7, 34:2 <sup>35</sup><br>PI - 37:2 <sup>35</sup><br>PI - 37:6, 33:1 <sup>35</sup><br>LPE - 16:0, 18:0, 18:1 <sup>35</sup>                                                                                                                                          | Upregulated<br>Downregulated<br>Upregulated<br>Upregulated<br>Downregulated<br>Downregulated                                                                                                                          | High res MALDI-MSI<br>High res MALDI-MSI<br>DESI-MSI<br>DESI-MSI<br>DESI-MSI<br>DESI-MSI                                                                     | Adjacent benign epithelium<br>Adjacent benign epithelium<br>Benign prostate tissue<br>Benign prostate tissue<br>Benign prostate tissue<br>Benign prostate tissue                                              |

|                                   |                                                                                                                                                     |               |              |                                                                   |
|-----------------------------------|-----------------------------------------------------------------------------------------------------------------------------------------------------|---------------|--------------|-------------------------------------------------------------------|
|                                   | PC - 16:0/14:0, 16:0/16:1, 16:0/18:2, 16:0/18:1, 16:0/18:0, 18:1/18:2, 18:1/18:1, 18:0/18:1, 18:1/20:4, 18:1/20:218:1/20:1, 18:1/20:0 <sup>35</sup> | Upregulated   | ESI-QqQ/MS   | Tissue from healthy males                                         |
|                                   | SM - d18:1/24:2, d18:1/24:0 <sup>35</sup>                                                                                                           | Upregulated   | ESI-QqQ/MS   | Tissue from healthy males                                         |
|                                   | PC - 18:0/22:5 <sup>35</sup>                                                                                                                        | Downregulated | MALDI-ToF/MS | Tissue from healthy males                                         |
| <b>Colorectal cancer</b>          |                                                                                                                                                     |               |              |                                                                   |
| Tissue                            | PA - 31:0 <sup>36</sup>                                                                                                                             | Upregulated   | REIMS        | Normal adjacent mucosa                                            |
|                                   | PG - 36:1 <sup>36</sup>                                                                                                                             | Upregulated   | REIMS        | Normal adjacent mucosa                                            |
|                                   | PS - 41:0, 44:6, 44:8 <sup>36</sup>                                                                                                                 | Upregulated   | REIMS        | Normal adjacent mucosa                                            |
|                                   | PS - 43:5 <sup>36</sup>                                                                                                                             | Downregulated | REIMS        | Normal adjacent mucosa                                            |
|                                   | PA - 36:2 <sup>23</sup>                                                                                                                             | Upregulated   | MS           | Adjacent normal tissue                                            |
|                                   | PC - 32:1, PC 34:1 <sup>23</sup>                                                                                                                    | Upregulated   | MS           | Adjacent normal tissue                                            |
|                                   | PA - 38:3, PA 40:5 <sup>23</sup>                                                                                                                    | Downregulated | MS           | Adjacent normal tissue                                            |
|                                   | PC - 38:4 <sup>23</sup>                                                                                                                             | Downregulated | MS           | Adjacent normal tissue                                            |
|                                   | PE - 38:4 <sup>23</sup>                                                                                                                             | Downregulated | MS           | Adjacent normal tissue                                            |
|                                   | PI - 38:4 <sup>23</sup>                                                                                                                             | Downregulated | MS           | Adjacent normal tissue                                            |
|                                   | SM - 22:0, 24:1 <sup>23</sup>                                                                                                                       | Downregulated | MS           | Adjacent normal tissue                                            |
|                                   | PC <sup>37</sup>                                                                                                                                    | Upregulated   | HPLC         | Adjacent normal tissue                                            |
|                                   | PC - 16:0/18:1 <sup>38</sup>                                                                                                                        | Upregulated   | MALDI-MSI    | Adjacent colorectal mucosa and tumour remote tissue – 10 cm apart |
|                                   | LPC - 16:0, 18:1 <sup>38</sup>                                                                                                                      | Upregulated   | MALDI-MSI    | Adjacent colorectal mucosa and tumour remote tissue – 10 cm apart |
|                                   | PC - 16:0/16:1 <sup>39</sup>                                                                                                                        | Upregulated   | Imaging MS   | Adjacent non-neoplastic mucosa                                    |
|                                   | PC <sup>40</sup>                                                                                                                                    | Upregulated   | MS           | Adjacent normal mucosa                                            |
|                                   | PE <sup>40</sup>                                                                                                                                    | Upregulated   | MS           | Adjacent normal mucosa                                            |
|                                   | PC, PE, PI <sup>41</sup>                                                                                                                            | Upregulated   | MRS          | Adjacent normal mucosa – 4 cm or greater apart                    |
|                                   | PS <sup>41</sup>                                                                                                                                    | Downregulated | MRS          | Adjacent normal mucosa – 4 cm or greater apart                    |
|                                   | PC - 26:0, 28:1, 30:0, 31:2, 31:4, 32:1, 34:1 <sup>42</sup>                                                                                         | Upregulated   | LC-MS        | Tumour adjacent tissue                                            |
|                                   | PE - 28:1, 31:4, 33:4 <sup>42</sup>                                                                                                                 | Upregulated   | LC-MS        | Tumour adjacent tissue                                            |
|                                   | PG - 37:6 <sup>42</sup>                                                                                                                             | Upregulated   | LC-MS        | Tumour adjacent tissue                                            |
|                                   | PS - 16:0, 28:2 <sup>42</sup>                                                                                                                       | Upregulated   | LC-MS        | Tumour adjacent tissue                                            |
|                                   | LPC - 24:0 <sup>42</sup>                                                                                                                            | Upregulated   | LC-MS        | Tumour adjacent tissue                                            |
|                                   | LPE - 16:1, 18:2 <sup>42</sup>                                                                                                                      | Upregulated   | LC-MS        | Tumour adjacent tissue                                            |
|                                   | LPG - 20:4, 21:0 <sup>42</sup>                                                                                                                      | Upregulated   | LC-MS        | Tumour adjacent tissue                                            |
|                                   | SM - 24:2, 39:2 <sup>42</sup>                                                                                                                       | Upregulated   | LC-MS        | Tumour adjacent tissue                                            |
|                                   | Sphingosine - 14:2, 18:3 <sup>42</sup>                                                                                                              | Upregulated   | LC-MS        | Tumour adjacent tissue                                            |
| Cells isolated from tumour tissue | PC - 32:0, 32:1, 36:5, 38:4 <sup>43</sup>                                                                                                           | Upregulated   | LC-MS/MS     | Cells isolated from tumour adjacent normal tissue                 |
|                                   | LPC - 14:0, 22:0, 24:0, 26:0, 16:1, 22:1, 24:1, 20:3, 20:4, 22:4, 22:5, 22:6 <sup>43</sup>                                                          | Upregulated   | LC-MS/MS     | Cells isolated from tumour adjacent normal tissue                 |

|                                         |                                                                                                                                                                                                                                                                                                                                                                                                                                                                                                       |                                                                                                                                                 |                                                                                                      |                                                                                                                                                                                                                                                        |
|-----------------------------------------|-------------------------------------------------------------------------------------------------------------------------------------------------------------------------------------------------------------------------------------------------------------------------------------------------------------------------------------------------------------------------------------------------------------------------------------------------------------------------------------------------------|-------------------------------------------------------------------------------------------------------------------------------------------------|------------------------------------------------------------------------------------------------------|--------------------------------------------------------------------------------------------------------------------------------------------------------------------------------------------------------------------------------------------------------|
|                                         | LPE - 18:0, 22:0, 24:0, 16:1, 22:1, 24:1, 20:3, 20:4, 22:4, 22:5, 22:6 <sup>43</sup><br>LPS - 16:1, 20:3 <sup>43</sup>                                                                                                                                                                                                                                                                                                                                                                                | Upregulated<br>Upregulated                                                                                                                      | LC-MS/MS<br>LC-MS/MS                                                                                 | Cells isolated from tumour adjacent normal tissue<br>Cells isolated from tumour adjacent normal tissue                                                                                                                                                 |
| <b>Colorectal Liver Metastasis</b>      |                                                                                                                                                                                                                                                                                                                                                                                                                                                                                                       |                                                                                                                                                 |                                                                                                      |                                                                                                                                                                                                                                                        |
| Tumour tissue                           | PC - 36:2-16:0/20:2, 38:3-18:1/20:2, 38:2-18:1/20:1, 36:2-16:1/20:1 <sup>44</sup><br>PE - 40:1-18:1/22:0, 38:3-18:1/20:2, 38:4-18:2/20:2, 34:1-16:1/18:0 <sup>44</sup><br>PS - 36:2-18:1/18:1 <sup>44</sup><br>SM - 34:1-d18:1/16:0 <sup>44</sup><br>PC - 38:6-16:0/22:6 <sup>44</sup><br>PE - 38:7-16:1/22:6, 34:3-16:0/18:3, 40:7-18:1/22:6, 38:6-16:0/22:6, 36:5-16:0/20:5, 36:4-16:0/20:4, 40:6-18:0/22:6 <sup>44</sup><br>PI - 36:1-16:0/20:1 <sup>44</sup><br>PS - 40:7-18:1/22:6 <sup>44</sup> | Upregulated<br>Upregulated<br>Upregulated<br>Upregulated<br>Downregulated<br>Downregulated<br>Downregulated<br>Downregulated                    | LC-ESI-MS<br>LC-ESI-MS<br>LC-ESI-MS<br>LC-ESI-MS<br>LC-ESI-MS<br>LC-ESI-MS<br>LC-ESI-MS<br>LC-ESI-MS | Normal liver parenchyma<br>Normal liver parenchyma                                   |
| <b>Ovarian cancer</b>                   |                                                                                                                                                                                                                                                                                                                                                                                                                                                                                                       |                                                                                                                                                 |                                                                                                      |                                                                                                                                                                                                                                                        |
| Tissue sample                           | PC - 32:3, 34:1, 36:2 <sup>45</sup><br>PI - 38:4 <sup>45</sup>                                                                                                                                                                                                                                                                                                                                                                                                                                        | Upregulated<br>Upregulated                                                                                                                      | MALDI-MS<br>MALDI-MS                                                                                 | Adjacent normal tissue<br>Adjacent normal tissue                                                                                                                                                                                                       |
| <b>Urothelial cancer of the bladder</b> |                                                                                                                                                                                                                                                                                                                                                                                                                                                                                                       |                                                                                                                                                 |                                                                                                      |                                                                                                                                                                                                                                                        |
| Tumour tissue                           | PC <sup>46</sup><br>PE <sup>46</sup><br>PI <sup>46</sup><br>PS <sup>46</sup>                                                                                                                                                                                                                                                                                                                                                                                                                          | Upregulated<br>Upregulated<br>Upregulated<br>Upregulated                                                                                        | LC-MS<br>LC-MS<br>LC-MS<br>LC-MS                                                                     | Benign adjacent tissue, normal bladder tissue<br>Benign adjacent tissue, normal bladder tissue<br>Benign adjacent tissue, normal bladder tissue<br>Benign adjacent tissue, normal bladder tissue                                                       |
| <b>Pancreatic cancer</b>                |                                                                                                                                                                                                                                                                                                                                                                                                                                                                                                       |                                                                                                                                                 |                                                                                                      |                                                                                                                                                                                                                                                        |
| Ductal adenocarcinoma tissue            | PS <sup>47</sup> (detected on the cell surface)                                                                                                                                                                                                                                                                                                                                                                                                                                                       | Upregulated                                                                                                                                     | Annexin V-FITC Staining, Flow Cytometry                                                              | Adjacent normal tissue                                                                                                                                                                                                                                 |
| <b>Gastric cancer</b>                   |                                                                                                                                                                                                                                                                                                                                                                                                                                                                                                       |                                                                                                                                                 |                                                                                                      |                                                                                                                                                                                                                                                        |
| Tissue                                  | PC - 16:0/18:0 <sup>48</sup><br>LPC - 16:0 <sup>48</sup><br>PC - 32:1, 34:1, 36:1 <sup>23</sup><br>PA - 36:2 <sup>23</sup><br>PC - 38:4, 38:6 <sup>23</sup><br>PA - 38:3, 40:5 <sup>23</sup><br>PE - 38:4 <sup>23</sup><br>PI - 38:4 <sup>23</sup><br>SM - 22:0, 24:1 <sup>23</sup>                                                                                                                                                                                                                   | Upregulated<br>Downregulated<br>Upregulated<br>Upregulated<br>Downregulated<br>Downregulated<br>Downregulated<br>Downregulated<br>Downregulated | MALDI-MSI<br>MALDI-MSI<br>MS<br>MS<br>MS<br>MS<br>MS<br>MS<br>MS                                     | Adjacent non-neoplastic mucosa<br>Adjacent non-neoplastic mucosa<br>Adjacent normal tissue<br>Adjacent normal tissue<br>Adjacent normal tissue<br>Adjacent normal tissue<br>Adjacent normal tissue<br>Adjacent normal tissue<br>Adjacent normal tissue |
| <b>Glioblastoma</b>                     |                                                                                                                                                                                                                                                                                                                                                                                                                                                                                                       |                                                                                                                                                 |                                                                                                      |                                                                                                                                                                                                                                                        |

|                                          |                                                                                                                                                                                                                                                                                                             |                                                                                                                              |                                                                                              |                                                                                                                                                                                                                                                                                                                                                                                                      |
|------------------------------------------|-------------------------------------------------------------------------------------------------------------------------------------------------------------------------------------------------------------------------------------------------------------------------------------------------------------|------------------------------------------------------------------------------------------------------------------------------|----------------------------------------------------------------------------------------------|------------------------------------------------------------------------------------------------------------------------------------------------------------------------------------------------------------------------------------------------------------------------------------------------------------------------------------------------------------------------------------------------------|
| Cell line A172<br>(Single cell analysis) | PC - 32:2/32:1, 32:2/32:0, 32:1/32:0, 33:2/33:1, 33:2/33:0, 33:1/33:0, 34:2/34:1, 34:2/34:0, 34:1/34:0 <sup>49</sup><br>PE - 20:1 <sup>49</sup>                                                                                                                                                             | Upregulated<br>Upregulated                                                                                                   | Pico-ESI-MS<br>Pico-ESI-MS                                                                   | Normal human astrocyte cell line HA<br>(Single cell analysis)                                                                                                                                                                                                                                                                                                                                        |
| <b>Oesophageal Cancer</b>                |                                                                                                                                                                                                                                                                                                             |                                                                                                                              |                                                                                              |                                                                                                                                                                                                                                                                                                                                                                                                      |
| Adenocarcinoma tissue                    | PE - 38:1, 38:5 <sup>50</sup><br>PG - 40:6, 38:6, PG 38:5, 40:8, 40:7, 36:4, 34:2, 36:3, 36:0, 36:2 <sup>50</sup><br>PI - 37:4, 40:5, 40:4, 38:5 <sup>50</sup><br>PS - 44:9, 42:8 <sup>50</sup><br>PA - 38:1 <sup>50</sup><br>PE - 34:1 <sup>50</sup><br>PS - 36:2 <sup>50</sup><br>PA - 36:2 <sup>50</sup> | Upregulated<br>Upregulated<br>Upregulated<br>Upregulated<br>Upregulated<br>Downregulated<br>Downregulated<br>Downregulated   | DESI-MSI<br>DESI-MSI<br>DESI-MSI<br>DESI-MSI<br>DESI-MSI<br>DESI-MSI<br>DESI-MSI<br>DESI-MSI | Matched healthy oesophageal epithelium - <5 cm apart<br>Matched healthy oesophageal epithelium - <5 cm apart |
| Tissue                                   | PC - 32:1, 34:1, 36:1 <sup>23</sup><br>PA - 36:2 <sup>23</sup><br>PC - 38:4, 38:6 <sup>23</sup><br>PA - 38:3, 40:5 <sup>23</sup><br>PE - 38:4 <sup>23</sup><br>PI - 38:4 <sup>23</sup><br>SM - 22:0, 24:1 <sup>23</sup>                                                                                     | Upregulated<br>Upregulated<br>Downregulated<br>Downregulated<br>Downregulated<br>Downregulated                               | MS<br>MS<br>MS<br>MS<br>MS<br>MS                                                             | Adjacent normal tissue<br>Adjacent normal tissue<br>Adjacent normal tissue<br>Adjacent normal tissue<br>Adjacent normal tissue<br>Adjacent normal tissue                                                                                                                                                                                                                                             |
| <b>Thyroid cancer</b>                    |                                                                                                                                                                                                                                                                                                             |                                                                                                                              |                                                                                              |                                                                                                                                                                                                                                                                                                                                                                                                      |
| Tissue                                   | PC - 16:0/18:1, 16:0/18:2 <sup>51</sup><br>SM - d18:0/16:1 <sup>51</sup><br>PC - 34:1, 38:6 <sup>23</sup><br>PA - 36:2 <sup>23</sup><br>PA - 38:3, 40:5 <sup>23</sup><br>PE - 38:4 <sup>23</sup><br>PI 38:4 <sup>23</sup><br>SM - 22:0, 24:1 <sup>23</sup>                                                  | Upregulated<br>Upregulated<br>Upregulated<br>Upregulated<br>Downregulated<br>Downregulated<br>Downregulated<br>Downregulated | MSI<br>MSI<br>MS<br>MS<br>MS<br>MS<br>MS<br>MS                                               | Adjacent normal tissue<br>Adjacent normal tissue                                                                                                                                                                                         |
| <b>Hepatocellular carcinoma</b>          |                                                                                                                                                                                                                                                                                                             |                                                                                                                              |                                                                                              |                                                                                                                                                                                                                                                                                                                                                                                                      |
| Tissue                                   | PC - 30:0 <sup>52</sup><br>PC - 34:2 <sup>52</sup><br>PE - 34:2 <sup>52</sup><br>SM - 24:0 <sup>52</sup><br>PC - 34:0, 32:0, 42:2, 34:3, 32:2, 44:3 <sup>53</sup><br>PC - 26:0, 34:2, 38:6, 40:5 <sup>53</sup>                                                                                              | Upregulated<br>Downregulated<br>Downregulated<br>Downregulated<br>Upregulated<br>Downregulated                               | ESI-MS<br>ESI-MS<br>ESI-MS<br>ESI-MS<br>UPLC-MS<br>UPLC-MS                                   | Benign hepatic tissue<br>Benign hepatic tissue<br>Benign hepatic tissue<br>Benign hepatic tissue<br>Normal liver tissue<br>Normal liver tissue                                                                                                                                                                                                                                                       |
| <b>Renal cell carcinoma</b>              |                                                                                                                                                                                                                                                                                                             |                                                                                                                              |                                                                                              |                                                                                                                                                                                                                                                                                                                                                                                                      |

|        |                                                                                                                                                                                   |               |           |                                 |
|--------|-----------------------------------------------------------------------------------------------------------------------------------------------------------------------------------|---------------|-----------|---------------------------------|
| Tissue | PC - 14:0/16:0, 14:0/18:2, 16:0/16:0, 16:0/16:1, 16:1/16:1,<br>16:0/18:0, 16:1/18:2, 17:0/18:2, 18:0/18:2, 18:2/18:2, 18:0/20:3,<br>18:0/20:4, 20:1/18:2, 20:2/18:1 <sup>54</sup> | Upregulated   | LC-TOF/MS | Surrounding normal renal cortex |
|        | PC - 16:0/18:1, 16:0/18:2, 16:0/20:4, 16:0/20:5, 18:1/20:4,<br>16:0/22:5, 16:0/22:6 <sup>54</sup>                                                                                 | Downregulated | LC-TOF/MS | Surrounding normal renal cortex |

[e] – Nine breast cancer cell lines (ZR-75-1, T-47D, MCF7, MDA-MB-231, MDA-MB-453, MDA-MB-468, SK-BR-3, BT-474 and BT-549).

[f]- Upregulated in LNCaP, 22RV1

[g]- Upregulated in 22RV1

[h]- Upregulated in LNCaP

[i]- Upregulated in all 3 cell lines

[j]- Downregulated in DU145

[k]- Downregulated in LNCaP, DU145

[l]- Downregulated in 22RV1

## Abbreviations

2D TLC – Two-dimensional thin layer chromatography.

AB – Agrobacterium medium, derivative of M9 minimal medium.

BHI – Brain heart infusion.

DESI – Desorption electron spray ionization.

DESI-MS - Desorption electron spray ionization mass spectrometry.

DESI-IMS - Desorption electron spray ionization imaging mass spectrometry.

DI-ESI(±)-FTICR MS – Direct-infusion positive and negative ion electrospray ionization Fourier transform ion cyclotron resonance mass spectrometry.

DI MS – Direct-infusion electrospray ionization mass spectrometry.

ESI-MS – Electron spray ionization mass spectrometry.

ESI-MS/MS – Electron spray ionization tandem mass spectrometry.

FAB-MS – Fast atom bombardment mass spectrometry.

GC – Gas chromatography.

GC-MS – Gas chromatography coupled with mass spectrometry.

High res – High resolution.

HILIC-HPLC/ESI-MS – Hydrophilic interaction chromatography coupled with high performance liquid chromatography coupled with electron spray ionization mass spectrometry.

HILIC-HPLC/ESI-MS-MALDI-MS – Hydrophilic interaction chromatography coupled with high performance liquid chromatography coupled with electron spray ionization tandem mass spectrometry and matrix-assisted laser desorption.

HPLC – High performance liquid chromatography.

IHC – Immunohistochemistry.

MSI – Mass spectrometry imaging.

LC/ESI-MS/MS – Liquid chromatography coupled with electron spray ionization tandem mass spectrometry.

LC-MS – Liquid chromatography coupled with mass spectrometry.

LC-MS/MS - Liquid chromatography coupled with tandem mass spectrometry.

LC-TOF/MS – Liquid chromatography coupled with time-of-flight mass spectrometry.

MALDI-FTICR-MS – Matrix-assisted laser desorption/ionization Fourier transform ion cyclotron mass spectrometry.

MALDI-MS – Matrix-assisted laser desorption/ionization mass spectrometry.

MALDI-MSI – Matrix-assisted laser desorption mass spectrometry imaging.

MHA – Mueller-Hinton agar.

MS – Mass spectrometry.

MRS – Magnetic resonance spectroscopy.

nLC/ESI-MS/MS – Nano-scale liquid chromatography coupled with electron spray ionization tandem mass spectrometry.

NMR – Nuclear magnetic resonance spectroscopy.

Non-specific broth (per L) –  $(\text{NH}_4)_2\text{SO}_4$  2 g;  $\text{KH}_2\text{PO}_4$  4 g;  $\text{Na}_2\text{HPO}_4 \cdot 7\text{H}_2\text{O}$  4 g;  $\text{MgSO}_4 \cdot 7\text{H}_2\text{O}$  0.2 g;  $\text{CaCl}_2 \cdot 2\text{H}_2\text{O}$ , 0.001 g; and  $\text{FeSO}_4 \cdot 7\text{H}_2\text{O}$ , 0.001 g, pH 7.8.

REIMS – Rapid evaporative ionization mass spectrometry.

RP-HILIC – Reverse phase hydrophilic interaction liquid chromatography.

RP-HPLC-ESI-iontrap-MS – Reverse phase high performance liquid chromatography coupled with electron spray ionization, iontrap mass spectrometry.

RRLC-MS – Rapid resolution liquid chromatography coupled with mass spectrometry.

Synthetic broth 1 (per L) –  $\text{Na}_2\text{HPO}_4 \cdot 12\text{H}_2\text{O}$  13.9 g;  $\text{KH}_2\text{PO}_4$  2.1 g;  $\text{NH}_4\text{Cl}$  1.0 g;  $\text{CaCl}_2$  0.0146 g;  $\text{MgSO}_4$  0.22 g;  $\text{FeCl}_3 \cdot 4\text{H}_2\text{O}$  0.24 mg; sodium lactate 2.5 g; peptone 5 g; yeast extract 1.0 g and  $\text{NaCl}$  0.5 g, 50 g or 100 g.

Synthetic media 2 (per L) – 19 mM  $\text{KCl}$ , 0.49 mM  $\text{K}_2\text{HPO}_4$ , 79 mM  $\text{NaCl}$ , 20 mM  $\text{NH}_4\text{Cl}$ , 1.4 mM  $\text{Na}_2\text{SO}_4$ , 0.1 mM adenine, 0.1 mM xanthine, 0.1 mM uracil, 1.8 mM alanine, 1.4 mM arginine, 0.75 mM asparagine, 1.5 mM cysteine, 0.75 mM glutamic acid, 0.3 mM glycine, 1.1 mM histidine, 2 mM isoleucine, 4 mM leucine, 3.5 mM lysine, 1.1 mM methionine, 0.09 mM phenylalanine, 4.6 mM proline, 2.8 mM serine, 1.9 mM threonine, 0.08 mM tyrosine, 2.5 mM valine, and 0.1 M tris(hydroxymethyl) aminomethane, pH 7.4.

Synthetic media 3 (per L) – Substrate Substrate (glucose or succinate) 5 g;  $\text{NH}_4\text{NO}_3$  6 g;  $\text{K}_2\text{HPO}_4$  5 g;  $\text{KH}_2\text{PO}_4$  2 g; 0.5 mL of 1 %  $\text{CaCl}_2 \cdot 2\text{H}_2\text{O}$  solution in water; 1 mL of trace elements solution containing (g/L):  $\text{MnCl}_2 \cdot 4\text{H}_2\text{O}$  0.004 g;  $\text{CuSO}_4 \cdot 5\text{H}_2\text{O}$  2.0 g;  $\text{ZnSO}_4 \cdot 7\text{H}_2\text{O}$  2.2 g; ammonium molybdate, 0.22 g; and  $\text{FeSO}_4 \cdot 7\text{H}_2\text{O}$  1.0 mL of 1.0 %, pH 6).

TLC – Thin layer chromatography.

TSB – Tryptic soy broth (enriched with chloramphenicol or erythromycin).

UHPLC-ESI-TOF/MS – Ultra high-performance liquid chromatography coupled with electron spray ionization time-of-flight mass spectrometry.

UPLC-ESI-MS - Ultra high-performance liquid chromatography coupled with electron spray ionization mass spectrometry.

UHPLC-MS – Ultra high-performance liquid chromatography coupled with mass spectrometry.

UPLC – Ultra high-performance liquid chromatography.

## References

- 1 N. N. Mishra, A. S. Bayer, T. T. Tran, Y. Shamoo, E. Mileykovskaya, W. Dowhan, Z. Guan and C. A. Arias, *PLoS One*, 2012, **7**, e43958–e43958.
- 2 H. U. KOCH, R. HAAS and W. FISCHER, *Eur. J. Biochem.*, 1984, **138**, 357–363.
- 3 Z. DeMars, V. K. Singh and J. L. Bose, *J. Bacteriol.*, 2020, **202**(14):e00128-20.
- 4 N. N. Mishra, S.-J. Yang, A. Sawa, A. Rubio, C. C. Nast, M. R. Yeaman and A. S. Bayer, *Antimicrob. Agents Chemother.*, 2009, **53**, 2312–2318.
- 5 A. Okabe, Y. Hirai, H. Hayashi and Y. Kanemasa, *Biochim. Biophys. Acta (BBA)-Lipids Lipid Metab.*, 1980, **617**, 28–35.
- 6 K. Yasuhiro, Y. Tiekō and H. Hideo, *Biochim. Biophys. Acta Lipids Lipid Metab.*, 1972, **280**, 444–450.
- 7 P. H. Ray and D. C. White, *J. Bacteriol.*, 1972, **109**, 668–677.
- 8 M. K. Wassef, *Lipids*, 1976, **11**, 364–369.
- 9 H. S. Aluyi, V. Boote, D. B. Drucker, J. M. Wilson and Y. H. Ling, *J. Appl. Bacteriol.*, 1992, **73**, 426–432.
- 10 A. E. Eder, S. A. Munir, C. R. Hobby, D. M. Anderson, J. L. Herndon, A. W. Siv, S. J. K. Symes and D. K. Giles, *Microbiology*, 2017, **163**, 1626–1636.
- 11 C. C. Scott, S. R. Makula and W. R. Finnerty, *J. Bacteriol.*, 1976, **127**, 469–480.
- 12 C. Le Sénéchal, M. Crouzet, P. Costaglioli, C. Barthe, C. Buré and S. Vilain, *Lipids*, 2019, **54**, 519–529.
- 13 T. Yosuke, I. Aya, S. Motoyuki, I. Sosaku, T. Naoki, N.-K. Toshiaki, U. Hiroo and N. Nobuhiko, *Biotechnol. Biochem.*, 2011, **75**, 605–607.
- 14 P. Bernat, P. Siewiera, A. Soboń and J. Długoński, *World J. Microbiol. Biotechnol.*, 2014, **30**, 2343–2350.
- 15 E. Deschamps, A. Schaumann, I. Schmitz-Afonso, C. Afonso, E. Dé, C. Loutelier-Bourhis and S. Alexandre, *Biochim. Biophys. Acta Biomembr.*, 2021, **1863**, 183482.
- 16 R. Aggeler, R. L. Then and R. Ghosh, *J. Gen. Microbiol.*, 1987, **133**, 3383–3392.
- 17 P. Bernat, K. Paraszkiwicz, P. Siewiera, M. Moryl, G. Płaza and J. Chojniak, *World J. Microbiol. Biotechnol.*, 2016, **32**, 1–13.
- 18 S. Hiraoka, H. Matsuzaki and I. Shibuya, *FEBS Lett.*, 1993, **336**, 221–224.
- 19 R. Schmidt, D. Yonghong and R. Hoffmann, *Diagn. Microbiol. Infect. Dis.*, 2018, **90**, 316–323.
- 20 G. K. Lee, H. S. Lee, Y. S. Park, J. H. Lee, S. C. Lee, J. H. Lee, S. J. Lee, S. R. Shanta, H. M. Park, H. R. Kim, I. H. Kim, Y. H. Kim, J. I. Zo, K. P. Kim and H. K. Kim, *Lung Cancer*, 2012, **76**, 197–203.
- 21 E. Marien, M. Meister, T. Muley, S. Fieuws, S. Bordel, R. Derua, J. Spraggins, R. de Plas, J. Dehairs, J. Wouters, M. Bagadi, H. Dienemann, M. Thomas, P. A. Schnabel, R. M. Caprioli, E. Waelkens and J. V Swinnen, *Int. J. Cancer*, 2015, **137**, 1539–1548.
- 22 L. You, Y. Fan, X. Liu, S. Shao, L. Guo, H. A. A. Noreldeen, Z. Li, Y. Ouyang, E. Li, X. Pan, T. Liu, X. Tian, F. Ye, X. Li and G. Xu, *J. Proteome Res.*, 2020, **19**, 3750–3760.
- 23 S. Guo, Y. Wang, D. Zhou and Z. Li, *Sci. Rep.*, 2014, **4**, 5959.
- 24 M. Zhang, J. He, T. Li, H. Hu, X. Li, H. Xing, J. Wang, F. Yang, Q. Ma, B. Liu, C. Tang, Z. Abliz and X. Liu, *Front. Oncol.*, 2019, **0**, 804.
- 25 Y. Muranishi, T. Sato, S. Ito, J. Satoh, A. Yoshizawa, S. Tamari, Y. Ueda, Y. Yutaka, T. Menju, T. Nakamura and H. Date, *Sci. Rep.*, 2019, **9**, 8916.
- 26 M. L. Dória, C. Z. Cotrim, C. Simões, B. Macedo, P. Domingues, M. R. Domingues and L. A. Helguero, *J Cell Physiol*, 2013, **228**, 457–468.



- 27 H. Y. Kim, K. M. Lee, S. H. Kim, Y. J. Kwon, Y. J. Chun and H. K. Choi, *Oncotarget*, 2016, **7**, 67111–67128.
- 28 M. Hilvo, C. Denkert, L. Lehtinen, B. Müller, S. Brockmöller, T. Seppänen-Laakso, J. Budczies, E. Bucher, L. Yetukuri, S. Castillo, E. Berg, H. Nygren, M. Sysi-Aho, J. L. Griffin, O. Fiehn, S. Loibl, C. Richter-Ehrenstein, C. Radke, T. Hyötyläinen, O. Kallioniemi, K. Iljin and M. Orešič, *Cancer Res.*, 2011, **71**, 3236–3245.
- 29 E. Cífková, M. Holčápek, M. Lísa, D. Vrána, J. Gatěk and B. Melichar, *Anal. Bioanal. Chem.*, 2015, **407**, 991–1002.
- 30 S. Kang, A. Lee, Y. S. Park, S. C. Lee, S. Y. Park, S. Y. Han, K. P. Kim, Y. H. Kim, C. W. Yoo and H. K. Kim, *Int. J. Gynecol. Cancer*, 2011, **21**, 1566–1572.
- 31 J. Tsuchida, M. Nagahashi, M. Nakajima, E. Katsuta, O. M. Rashid, Q. Qi, L. Yan, S. Okuda, K. Takabe and T. Wakai, *J. Surg. Res.*, 2020, **256**, 645–656.
- 32 A. Sorvina, C. A. Bader, C. Caporale, E. A. Carter, I. R. D. Johnson, E. J. Parkinson-Lawrence, P. V. Simpson, P. J. Wright, S. Stagni, P. A. Lay, M. Massi, D. A. Brooks and S. E. Plush, *Oncotarget*, 2018, **9**, 35541.
- 33 T. Goto, N. Terada, T. Inoue, K. Nakayama, Y. Okada, T. Yoshikawa, Y. Miyazaki, M. Uegaki, S. Sumiyoshi, T. Kobayashi, T. Kamba, K. Yoshimura and O. Ogawa, *PLoS One*, 2014, **9**, e90242.
- 34 T. Goto, N. Terada, T. Inoue, T. Kobayashi, K. Nakayama, Y. Okada, T. Yoshikawa, Y. Miyazaki, M. Uegaki and N. Utsunomiya, *Prostate*, 2015, **75**, 1821–1830.
- 35 N. Morse, T. Jamaspishvili, D. Simon, P. G. Patel, K. Y. M. Ren, J. Wang, R. Oleschuk, M. Kaufmann, R. J. Gooding and D. M. Berman, *Lab. Investig.*, 2019, **99**, 1561–1571.
- 36 J. Alexander, L. Gildea, J. Balog, A. Speller, J. McKenzie, L. Muirhead, A. Scott, C. Kontovounisios, S. Rasheed, J. Teare, J. Hoare, K. Veselkov, R. Goldin, P. Tekkis, A. Darzi, J. Nicholson, J. Kinross and Z. Takats, *Surg. Endosc.*, 2017, **31**, 1361–1370.
- 37 I. Dobrzyńska, B. Szachowicz-Petelska, S. Sulkowski and Z. Figaszewski, *Mol. Cell. Biochem.*, 2005, **276**, 113–119.
- 38 R. Mirnezami, K. Spagou, P. A. Vorkas, M. R. Lewis, J. Kinross, E. Want, H. Shion, R. D. Goldin, A. Darzi, Z. Takats, E. Holmes, O. Cloarec and J. K. Nicholson, *Mol. Oncol.*, 2014, **8**, 39–49.
- 39 N. Kurabe, T. Hayasaka, M. Ogawa, N. Masaki, Y. Ide, M. Waki, T. Nakamura, K. Kurachi, T. Kahyo, K. Shinmura, Y. Midorikawa, Y. Sugiyama, M. Setou and H. Sugimura, *Cancer Sci.*, 2013, **104**, 1295–1302.
- 40 D. A. Dueck, M. Chan, K. Tran, J. T. Wong, F. T. Jay, C. Littman, R. Stimpson and P. C. Choy, *Mol. Cell Biochem.*, 1996, **162**, 97–103.
- 41 T. E. Merchant, J. N. Kasimos, P. W. de Graaf, B. D. Minsky, L. W. Gierke and T. Glonek, *Int. J. Color. Dis.*, 1991, **6**, 121–126.
- 42 A. Pakiet, K. Sikora, J. Kobiela, O. Rostkowska, A. Mika and T. Sledzinski, *Lipids Health Dis.*, 2021, **20**, 85.
- 43 J. Hofmanová, J. Slavík, M. Ciganek, P. Ovesná, Z. Tylichová, M. Karasová, O. Zapletal, N. Straková, J. Procházková, J. Bouchal, Z. Kolář, J. Ehrmann, M. Levková, Z. Hušková, P. Skalický, A. Kozubík, M. Machala and J. Vondráček, *Int. J. Mol. Sci.*, 2021, **22**(13), 6650.
- 44 S. Kiritani, K. Yoshimura, J. Arita, T. Kokudo, H. Hakoda, M. Tanimoto, T. Ishizawa, N. Akamatsu, J. Kaneko, S. Takeda and K. Hasegawa, *BMC Cancer* 2021 **211**, 2021, **21**, 1–9.
- 45 S. Kang, A. Lee, Y. S. Park, S. C. Lee, S. Y. Park, S. Y. Han, K. P. Kim, Y. H. Kim, C. W. Yoo and H. K. Kim, *Int. J. Gynecol. Cancer*, 2011, **21**, 1566–1572.
- 46 D. W. B. Piyarathna, T. M. Rajendiran, V. Putluri, V. Vantaku, T. Soni, F. C. von Rundstedt, S. R. Donepudi, F. Jin, S. Maity, C. R. Ambati, J. Dong, D. Gödde, S. Roth, S. Störkel, S. Degener, G. Michailidis, S. P. Lerner, S. Pennathur, Y. Lotan, C. Coarfa, A. Sreekumar and N. Putluri, *Eur. Urol. Focus*, 2018, **4**, 907–915.
- 47 H. W. Davis, A. Kaynak, S. D. Vallabhapurapu and X. Qi, *World J. Gastrointest. Oncol.*, 2021, **13**, 550.
- 48 T. Uehara, H. Kikuchi, S. Miyazaki, I. Iino, T. Setoguchi, Y. Hiramatsu, M. Ohta, K. Kamiya, Y. Morita, H. Tanaka, S. Baba, T. Hayasaka, M. Setou and H. Konno, *Ann Surg Oncol*, 2016, **23** Suppl 2, S206-13.
- 49 X.-C. Zhang, Q. Zang, H. Zhao, X. Ma, X. Pan, J. Feng, S. Zhang, R. Zhang, Z. Abliz and X. Zhang, *Anal. Chem.*, 2018, **90**, 9897–9903.
- 50 N. Abbassi-Ghadi, S. S. Antonowicz, J. S. McKenzie, S. Kumar, J. Huang, E. A. Jones, N. Strittmatter, G. Petts, H.

- Kudo, S. Court, J. M. Hoare, K. Veselkov, R. Goldin, Z. Takáts and G. B. Hanna, *Cancer Res.*, 2020, **80**, 2764–2774.
- 51 S. Ishikawa, I. Tateya, T. Hayasaka, N. Masaki, Y. Takizawa, S. Ohno, T. Kojima, Y. Kitani, M. Kitamura, S. Hirano, M. Setou and J. Ito, *PLoS One*, 2012, **7**, e48873.
- 52 Z. Liu, Z. Zhang, H. Mei, J. Mao and X. Zhou, *Hepatol. Int.*, 2020, **14**, 544–555.
- 53 E. B. Evangelista, S. A. Kwee, M. M. Sato, L. Wang, C. Rettenmeier, G. Xie, W. Jia and L. L. Wong, *Diagnostics 2019*, Vol. 9, Page 167, 2019, **9**, 167.
- 54 K. Saito, E. Arai, K. Maekawa, M. Ishikawa, H. Fujimoto, R. Taguchi, K. Matsumoto, Y. Kanai and Y. Saito, *Sci. Rep.*, 2016, **6**, 28932.
